# Supplementary material for: Macrophage migration inhibitory factor facilitates production of CCL5 in astrocytes following rat spinal cord injury
Source: Springer Nature journal article supplement (doi:10.1186/s12974-018-1297-z), 2018-09-04
Supplement: MOESM1 [file 16097034]

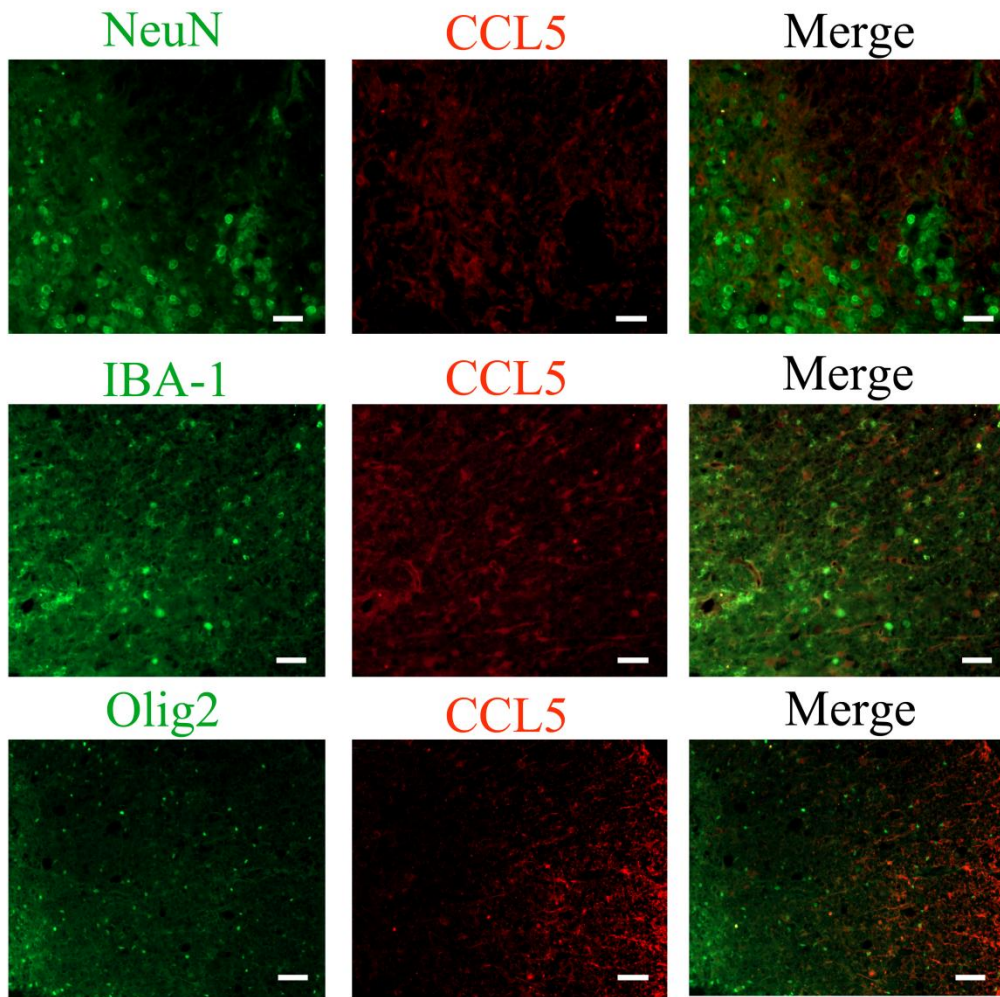

**Fig.1** Determination of CCL5 colocalization with NeuN-, IBA-1- or Olig2-positive cells following spinal cord contusion at 4d. Scale bars, 50  $\mu$ m.
